# Supplementary material
Source: Research Square preprint supplement (doi:10.21203/rs.3.rs-8790368/v1)
Supplement: Supplementary file 1 [file 20d9bf674328565db66c8e6a.docx]

**SUPPLEMENTARY MATERIAL**

**Supplementary Table 1: Topical and locally active drugs evaluated as potential negative control drugs (n=150)**

The table reports topical and locally applied drugs with minimal systemic bioavailability that were evaluated as potential negative control drugs for assessing specificity in the validation study.

| **ATC** | **Drugs** | **N**  **(% patients)**  N=44,951 | **ATC** | **Drugs** | **N**  **(% patients)**  **N=**44,951 |
| --- | --- | --- | --- | --- | --- |
| **Dermatologic** | |  |  |  |  |
| D01AC02 | Miconazole | 202 (0.4%) | D06BX02 | Ingenol mebutate | 107 (0.2%) |
| D01AC03 | Econazole | 11,685 (26.0%) | D07AB02 | Hydrocortisone butyrate | 10,711 (23.8%) |
| D01AC05 | Isoconazole | 1,982 (4.4%) | D07AB08 | Desonide | 11,944 (26.6%) |
| D01AC07 | Tioconazole | 87 (0.2%) | D07AC01 | Betamethasone | 23,299 (51.8%) |
| D01AC08 | Ketoconazole | 9,591 (21.3%) | D07AC05 | Fluocortolone | 48 (0.1%) |
| D01AC10 | Bifonazole | 5,551 (12.3%) | D07AC06 | Diflucortolone | 7,928 (17.6%) |
| D01AC11 | Oxiconazole | 1,860 (4.1%) | D07AC16 | Hydrocortisone aceponate | 1,898 (4.2%) |
| D01AC12 | Fenticonazole | 4,229 (9.4%) | D07AC17 | Fluticasone | 2,819 (6.3%) |
| D01AC13 | Omoconazole | 440 (1.0%) | D07AC19 | Difluprednate | 131 (0.3%) |
| D01AC14 | Sertaconazole | 6,881 (15.3%) | D07AD01 | Clobetasol | 12,111 (26.9%) |
| D01AC60 | Bifonazole in combination | 2,276 (5.1%) | D07BC04 | Diflucortolone and antiseptics | 249 (0.6%) |
| D01AE14 | Ciclopirox | 12,884 (28.7%) | D07XC01 | Betamethasone | 3,126 (7.0%) |
| D01AE15 | Terbinafine | 2,918 (6.5%) | D08AC02 | Chlorhexidine | 8,578 (19.1%) |
| D01AE16 | Amorolfine | 4,772 (10.6%) | D08AC04 | Hexamidine | 6,354 (14.1%) |
| D03AX06 | Becaplermin | 3 (0.0%) | D08AC52 | Chlorhexidine in combination | 22,606 (50.3%) |
| D05AD02 | Methoxsalen | 14 (0.0%) | D08AG02 | Povidone-iodine | 22,875 (50.9%) |
| D05AX02 | Calcipotriol | 294 (0.7%) | D08AJ58 | Benzethonium chloride in combination | 178 (0.4%) |
| D05AX03 | Calcitriol | 47 (0.1%) | D08AX07 | Sodium hypochlorite | 4,511 (10.0%) |
| D05AX04 | Tacalcitol | 109 (0.2%) | D10AD01 | Tretinoin | 1,300 (2.9%) |
| D05AX05 | Tazarotene | 20 (0.0%) | D10AD02 | Retinol (Vitamin A) | 4 (0.0%) |
| D05AX52 | Calcipotriol in combination | 2,419 (5.4%) | D10AD03 | Adapalene | 1,454 (3.2%) |
| D06AA02 | Chlortetracycline | 61 (0.1%) | D10AE01 | Benzoyl peroxide | 2,062 (4.6%) |
| D06AX01 | Fusidic acid | 15,524 (34.5%) | D10AF02 | Erythromycin | 4,059 (9.0%) |
| D06AX09 | Mupirocin | 7,265 (16.2%) | D10AF52 | Erythromycin in combination | 399 (0.9%) |
| D06BA01 | Silver sulfadiazine | 2,600 (5.8%) | D10BA01 | Isotretinoin | 320 (0.7%) |
| D06BB03 | Aciclovir | 6,396 (14.2%) | D11AH01 | Tacrolimus | 2,788 (6.2%) |
| D06BB04 | Podophyllotoxin | 124 (0.3%) | D11AH04 | Alitretinoin | 42 (0.1%) |
| D06BB10 | Imiquimod | 808 (1.8%) | D11AH05 | Dupilumab | 3 (0.0%) |
| D06BX01 | Metronidazole | 4,102 (9.1%) |  |  |  |
| **Gynecologic** | | | | | |
| G01AA51 | Nystatin in combination | 6,370 (14.2%) | G01AF08 | Tioconazole | 134 (0.3%) |
| G01AC03 | Chlorquinaldol | 546 (1.2%) | G01AF12 | Fenticonazole | 5,400 (12.0%) |
| G01AF01 | Metronidazole | 2,389 (5.3%) | G01AF16 | Omoconazole | 106 (0.2%) |
| G01AF04 | Miconazole | 347 (0.8%) | G01AF19 | Sertaconazole | 59 (0.1%) |
| G01AF05 | Econazole | 8,626 (19.2%) | G02BA03 | Plastic IUD w/ progestogens | 3,508 (7.8%) |
| G01AF07 | Isoconazole | 456 (1.0%) |  |  |  |
| **Joint and muscular** | | | | | |
| M02AA07 | Piroxicam | 1,208 (2.7%) | M02AA15 | Diclofenac | 26,651 (59.3%) |
| M02AA10 | Ketoprofen | 3,633 (8.1%) | M02AA17 | Niflumic acid | 4,660 (10.4%) |
| M02AA13 | Ibuprofen | 7,768 (17.3%) |  |  |  |
| **Nasal agents** | | | | | |
| R01AA05 | Oxymetazoline | 5,370 (11.9%) | R01AC05 | Spaglumic acid | 19 (0.0%) |
| R01AB05 | Ephedrine | 18 (0.0%) | R01AX03 | Ipratropium bromide | 652 (1.5%) |
| R01AB08 | Tuaminoheptane | 8,156 (18.1%) | R01AX05 | Ritiometan | 42 (0.1%) |
| R01AC01 | Cromoglicic acid | 233 (0.5%) | R01AX06 | Mupirocin | 365 (0.8%) |
| R01AC03 | Azelastine | 1,320 (2.9%) | R01AX10 | Various nasal preparations | 5,234 (11.6%) |
| **Ophtalmologic** | | | | | |
| S01AA11 | Gentamicin | 5 (0.0%) | S01ED03 | Levobunolol | 3 (0.0%) |
| S01AA12 | Tobramycin | 5,276 (11.7%) | S01ED04 | Metipranolol | 2 (0.0%) |
| S01AA13 | Fusidic acid | 3,234 (7.2%) | S01ED05 | Carteolol | 333 (0.7%) |
| S01AA16 | Rifamycin | 2,798 (6.2%) | S01ED51 | Timolol in combination | 1,167 (2.6%) |
| S01AA26 | Azithromycin | 4,818 (10.7%) | S01EE01 | Latanoprost | 1,334 (3.0%) |
| S01AA30 | Combinations of different antibiotics in ophthalmology | 345 (0.8%) | S01EE03 | Bimatoprost | 388 (0.9%) |
| S01AD02 | Trifluridine | 86 (0.2%) | S01EE04 | Travoprost | 348 (0.8%) |
| S01AD03 | Aciclovir | 310 (0.7%) | S01FA01 | Atropine | 514 (1.1%) |
| S01AD09 | Ganciclovir | 280 (0.6%) | S01FA06 | Tropicamide | 5,966 (13.3%) |
| S01AE01 | Ofloxacin | 1,190 (2.6%) | S01FB01 | Phenylephrine | 2,363 (5.3%) |
| S01AE02 | Norfloxacin | 822 (1.8%) | S01GX01 | Cromoglicic acid | 7,203 (16.0%) |
| S01AE03 | Ciprofloxacin | 1,384 (3.1%) | S01GX02 | Levocabastine | 2,625 (5.8%) |
| S01AX07 | Sodium borate | 12,991 (28.9%) | S01GX03 | Spaglumic acid | 3,338 (7.4%) |
| S01AX16 | Picloxydine | 3,884 (8.6%) | S01GX04 | Nedocromil | 17 (0.0%) |
| S01BA01 | Dexamethasone | 3,068 (6.8%) | S01GX05 | Lodoxamide | 287 (0.6%) |
| S01BA07 | Fluorometholone | 1,069 (2.4%) | S01GX07 | Azelastine | 806 (1.8%) |
| S01BA13 | Rimexolone | 616 (1.4%) | S01GX08 | Ketotifen | 2,801 (6.2%) |
| S01BC01 | Indometacin | 3,948 (8.8%) | S01GX09 | Olopatadine | 574 (1.3%) |
| S01BC03 | Diclofenac | 335 (0.7%) | S01GX10 | Epinastine | 53 (0.1%) |
| S01BC04 | Flurbiprofen | 1,326 (2.9%) | S01KA02 | Hypromellose | 4,935 (11.0%) |
| S01BC05 | Ketorolac | 490 (1.1%) | S01LA01 | Verteporfin | 18 (0.0%) |
| S01BC11 | Bromfenac sodium sesquihydrate | 609 (1.4%) | S01LA04 | Ranibizumab | 239 (0.5%) |
| S01CA01 | Dexamethasone + anti-infectives | 14,192 (31.6%) | S01LA05 | Aflibercept | 133 (0.3%) |
| S01CA03 | Hydrocortisone and anti-infectives | 862 (1.9%) | S01XA02 | Retinol | 6,159 (13.7%) |
| S01EA03 | Apraclonidine | 1,117 (2.5%) | S01XA08 | Acetylcysteine | 811 (1.8%) |
| S01EA05 | Brimonidine | 447 (1.0%) | S01XA20 | Artificial tears and other preparations | 16,679 (37.1%) |
| S01EB01 | Pilocarpine | 241 (0.5%) | S02AA12 | Rifamycin | 681 (1.5%) |
| S01EB51 | Pilocarpine in combination | 2 (0.0%) | S02AA15 | Ciprofloxacin | 24 (0.1%) |
| S01EC01 | Acetazolamide | 723 (1.6%) | S02AA16 | Ofloxacin | 4,172 (9.3%) |
| S01EC03 | Dorzolamide | 203 (0.5%) | S02CA05 | Fluocinolone and anti-infectives | 3139 (7.0%) |
| S01EC04 | Brinzolamide | 579 (1.3%) | S02CA06 | Dexamethasone and anti-infectives | 6,425 (14.3%) |
| S01EC54 | Brinzolamide in combination | 154 (0.3%) | S02CA07 | Fludrocortisone and anti-infectives | 3,782 (8.4%) |
| S01ED01 | Timolol | 593 (1.3%) | S02DA30 | Combinations (analg. and anesth.) | 2,852 (6.3%) |
| S01ED02 | Betaxolol | 15 (0.0%) |  |  |  |

**Abbreviation:** ATC, Anatomical Therapeutic Chemical

**Supplementary Table 2: Distribution of immunosuppressant use in the study population**

The table reports immunosuppressant drug use among patients with systemic lupus erythematosus and distinguishes between immunosuppressants that resulted in censoring of follow-up and those that did not.

| **ATC** | **Drugs** | **N (%patients)**  N=44,951 |
| --- | --- | --- |
| **Immunosuppressants not leading to censoring** | | |
| L04AX03 | Methotrexate | 9,850 (21.9%) |
| L04AA13 | Leflunomide | 764 (1.7%) |
| L04AB01 | Etanercept | 542 (1.2%) |
| L04AB04 | Adalimumab | 536 (1.2%) |
| L04AA26 | Belimumab | 370 (0.8%) |
| L04AB02 | Infliximab | 300 (0.7%) |
| L04AA24 | Abatacept | 268 (0.6%) |
| L04AC07 | Tocilizumab | 237 (0.5%) |
| L04AB05 | Certolizumab pegol | 170 (0.4%) |
| L04AB06 | Golimumab | 151 (0.3%) |
| L04AX04 | Lenalidomide | 115 (0.3%) |
| L04AC10 | Secukinumab | 98 (0.2%) |
| L04AC05 | Ustekinumab | 91 (0.2%) |
| L04AA37 | Baricitinib | 73 (0.2%) |
| L04AC03 | Anakinra | 59 (0.1%) |
| L04AA29 | Tofacitinib | 57 (0.1%) |
| L04AA32 | Apremilast | 46 (0.1%) |
| L04AC13 | Ixekizumab | 22 (0.0%) |
| L04AA31 | Teriflunomide | 17 (0.0%) |
| L04AA33 | Vedolizumab | 14 (0.0%) |
| L04AA27 | Fingolimod | 13 (0.0%) |
| L04AC14 | Sarilumab | 12 (0.0%) |
| L04AA25 | Eculizumab | 11 (0.0%) |
| L04AA44 | Upadacitinib | 9 (0.0%) |
| L04AA10 | Sirolimus | 7 (0.0%) |
| L04AA23 | Natalizumab | 7 (0.0%) |
| L04AC08 | Canakinumab | 7 (0.0%) |
| L04AA36 | Ocrelizumab | 5 (0.0%) |
| L04AC16 | Guselkumab | 5 (0.0%) |
| L04AX05 | Pirfenidone | 3 (0.0%) |
| **Immunosuppressants leading to censoring** | | |
| L04AX01 | Azathioprine | 1,867 (4.2%) |
| L04AD01 | Ciclosporin | 90 (0.2%) |
| L01AA01 | Cyclophosphamide | 55 (0.1%) |
| L04AA06 | Mycophenolic acid | 1,769 (3.9%) |
| L01XC02 | Rituximab | 1,516 (3.4%) |
| L04AD02 | Tacrolimus | 32 (0.1%) |

**Abbreviation:** ATC, Anatomical Therapeutic Chemical

**Supplementary Table 3a. Description of treatment arms comparing index drugs with any other drugs**

The table summarizes the characteristics of eligible treatment sequences (ETS) for index drugs and their corresponding “any other drugs” comparator arms. N denotes the number of ETS. Characteristics include the proportion of female patients, mean age at index date, history of exacerbations with organ involvement in the 360 days prior to index date, and standardized mean differences (SMDs).

|  | | **ETS**  **N** | **Females %** | | **Mean age (years)** | | **Previous exacerbations with organ involvement (%)*** | | **SMD **** |
| --- | --- | --- | --- | --- | --- | --- | --- | --- | --- |
| **Index Drug Arm** | **Any Drug Arm** | **Index Drug Arm** | **Any Drug Arm** | **Index Drug Arm** | **Any Drug Arm** |
| **Positive control drug (HCQ)** | P01BA02 | 8,957 | 88% | 88% | 47.94 | 47.73 | 4.96 | 3.81 | 0 | 288 |
| **Negative control drugs # (n=52)** | | | | | | | | | |
| Econazole | D01AC03 | 10,045 | 91% | 91% | 49.03 | 49.07 | 3.03 | 2.95 | 0 | 289 |
| Ketoconazole | D01AC08 | 7,997 | 87% | 87% | 47.15 | 47.03 | 2.76 | 2.71 | 0 | 293 |
| Bifonazole | D01AC10 | 4,786 | 89% | 88% | 51.52 | 51.65 | 2.65 | 2.21 | 0 | 291 |
| Fenticonazole | D01AC12 | 3,547 | 99% | 99% | 43.04 | 43.17 | 1.92 | 1.72 | 1 | 291 |
| Sertaconazole | D01AC14 | 5,954 | 99% | 99% | 43.39 | 43.55 | 2.72 | 2.50 | 1 | 293 |
| Ciclopirox | D01AE14 | 10,951 | 90% | 90% | 49.84 | 49.72 | 2.36 | 2.12 | 0 | 289 |
| Terbinafine | D01AE15 | 2,406 | 89% | 90% | 50.83 | 50.50 | 2.37 | 2.35 | 0 | 289 |
| Amorolfine | D01AE16 | 3,978 | 92% | 93% | 53.38 | 53.20 | 2.24 | 1.93 | 0 | 286 |
| Fusidic acid | D06AX01 | 13,290 | 89% | 89% | 50.04 | 50.04 | 2.88 | 2.70 | 0 | 292 |
| Mupirocin | D06AX09 | 6,218 | 89% | 90% | 50.32 | 50.04 | 2.47 | 2.15 | 0 | 291 |
| Aciclovir | D06BB03 | 5,376 | 94% | 94% | 49.72 | 49.95 | 2.52 | 2.03 | 0 | 291 |
| Metronidazole | D06BX01 | 3,301 | 93% | 93% | 50.88 | 50.53 | 2.12 | 1.81 | 0 | 292 |
| Hydrocortisone butyrate | D07AB02 | 8,888 | 89% | 89% | 50.59 | 50.63 | 2.07 | 1.87 | 0 | 291 |
| Desonide | D07AB08 | 9,636 | 90% | 90% | 48.91 | 49.02 | 2.38 | 2.11 | 0 | 290 |
| Betamethasone | D07AC01 | 18,797 | 88% | 88% | 49.72 | 49.73 | 2.53 | 2.15 | 0 | 292 |
| Diflucortolone | D07AC06 | 6,598 | 88% | 88% | 51.29 | 51.22 | 2.00 | 1.76 | 0 | 293 |
| Fluticasone | D07AC17 | 2,220 | 89% | 88% | 50.48 | 50.00 | 1.93 | 1.89 | 0 | 292 |
| Clobetasol | D07AD01 | 9,872 | 88% | 88% | 50.15 | 50.04 | 2.37 | 2.04 | 0 | 293 |
| Betamethasone | D07XC01 | 2,561 | 88% | 87% | 50.73 | 51.17 | 1.86 | 1.66 | 0 | 293 |
| Chlorhexidine | D08AC02 | 6,856 | 89% | 89% | 50.81 | 50.80 | 2.30 | 1.90 | 0 | 293 |
| Hexamidine | D08AC04 | 5,344 | 90% | 90% | 49.58 | 49.69 | 3.03 | 2.57 | 0 | 289 |
| Chlorhexidine (combin.) | D08AC52 | 18,300 | 88% | 88% | 50.04 | 49.79 | 2.78 | 2.53 | 0 | 294 |
| Povidone-iodine | D08AG02 | 15,774 | 87% | 87% | 50.78 | 50.40 | 2.88 | 2.63 | 0 | 296 |
| Sodium hypochlorite | D08AX07 | 3,924 | 89% | 89% | 51.29 | 51.02 | 3.23 | 2.89 | 0 | 291 |
| Nystatin in combination | G01AA51 | 5,302 | 100% | 94% | 43.56 | 43.76 | 2.49 | 2.38 | 0 | 296 |
| Econazole | G01AF05 | 7,350 | 100% | 93% | 43.15 | 43.38 | 2.74 | 2.33 | 0 | 291 |
| Fenticonazole | G01AF12 | 4,508 | 100% | 94% | 42.37 | 42.46 | 2.30 | 2.54 | 1 | 289 |
| Diclofenac | M02AA15 | 19,657 | 88% | 88% | 50.20 | 49.94 | 2.30 | 2.23 | 0 | 292 |
| Niflumic acid | M02AA17 | 3,804 | 90% | 91% | 50.81 | 50.91 | 1.79 | 1.65 | 0 | 295 |
| Oxymetazoline | R01AA05 | 4,878 | 90% | 91% | 46.68 | 46.61 | 1.87 | 1.74 | 1 | 289 |
| Tobramycin | S01AA12 | 4,607 | 89% | 89% | 50.92 | 50.72 | 2.33 | 1.87 | 0 | 294 |
| Fusidic acid | S01AA13 | 2,722 | 92% | 91% | 50.84 | 50.76 | 2.83 | 2.08 | 0 | 297 |
| Rifamycin | S01AA16 | 2,370 | 91% | 90% | 49.48 | 49.15 | 2.89 | 2.26 | 0 | 289 |
| Azithromycin | S01AA26 | 4,355 | 89% | 89% | 54.96 | 53.94 | 2.32 | 2.16 | 0 | 292 |
| Sodium borate | S01AX07 | 10,681 | 90% | 90% | 52.31 | 51.91 | 2.51 | 2.42 | 0 | 294 |
| Picloxydine | S01AX16 | 3,265 | 88% | 88% | 54.19 | 54.00 | 2.72 | 2.30 | 0 | 292 |
| Dexamethasone | S01BA01 | 2,686 | 89% | 89% | 59.30 | 58.51 | 2.18 | 1.68 | 0 | 292 |
| Indometacin | S01BC01 | 3,413 | 86% | 87% | 63.80 | 62.95 | 1.84 | 1.95 | 0 | 290 |
| Dexamethasone + anti-infectives | S01CA01 | 12,053 | 89% | 89% | 53.43 | 52.56 | 2.29 | 2.30 | 0 | 290 |
| Tropicamide | S01FA06 | 5,143 | 88% | 88% | 58.42 | 57.58 | 2.12 | 2.21 | 0 | 290 |
| Cromoglicic acid | S01GX01 | 5,970 | 93% | 94% | 50.11 | 50.05 | 1.68 | 1.75 | 0 | 292 |
| Levocabastine | S01GX02 | 2,338 | 93% | 93% | 51.59 | 51.26 | 2.49 | 2.03 | 0 | 292 |
| Spaglumic acid | S01GX03 | 2,771 | 92% | 93% | 52.62 | 52.54 | 2.09 | 1.80 | 0 | 290 |
| Ketotifen | S01GX08 | 2,577 | 93% | 94% | 51.51 | 50.89 | 1.76 | 1.27 | 0 | 291 |
| Hypromellose | S01KA02 | 4,037 | 93% | 94% | 53.29 | 53.17 | 2.76 | 2.33 | 0 | 291 |
| Retinol | S01XA02 | 5,195 | 89% | 89% | 53.69 | 53.15 | 2.81 | 2.81 | 0 | 295 |
| Artificial tears and other preparations | S01XA20 | 13,036 | 92% | 91% | 52.37 | 51.88 | 2.93 | 2.73 | 0 | 288 |
| Ofloxacin | S02AA16 | 3,671 | 89% | 89% | 47.99 | 47.89 | 2.16 | 1.85 | 0 | 292 |
| Fluocinolone and anti-infectives | S02CA05 | 2,696 | 91% | 91% | 50.62 | 50.34 | 1.65 | 1.65 | 0 | 287 |
| Dexamethasone and anti-infectives | S02CA06 | 5,564 | 90% | 90% | 49.03 | 49.06 | 2.06 | 1.57 | 0 | 290 |
| Fludrocortisone and anti-infectives | S02CA07 | 3,408 | 92% | 92% | 48.48 | 48.85 | 2.64 | 1.98 | 0 | 293 |
| Combinations (analg. & anesth.) | S02DA30 | 2,460 | 93% | 93% | 45.97 | 45.96 | 2.07 | 2.09 | 0 | 293 |

** Assessed through hospitalizations in the 360 days prior to index date*

*** N covariates with SMD>10% | N covariates in hdPS*

*# Negative controls drugs= topical or locally active drugs with SMD<1% in both control groups comparisons (vs. Any other drug and vs. Same ATC level 2 drugs)*

**Abbreviations:** ATC, Anatomical Therapeutic Chemical; ETS, Eligible treatment sequence; HCQ, hydroxychloroquine; hdPS, High-dimensional propensity score; SMD, Standardized mean difference

**Supplementary Table 3b. Description of treatment arms comparing index drugs with drugs of the same ATC Level 2 category.**

The table summarizes the characteristics of eligible treatment sequences (ETS) for index drugs and their corresponding “same ATC Level 2” comparator arms. N denotes the number of ETS. Characteristics include the proportion of female patients, mean age at index date, history of exacerbations with organ involvement in the 360 days prior to index date, and standardized mean differences (SMDs).

|  | | **ETS**  **N** | **Females %** | | **Mean age (years)** | | **Previous exacerbations with organ involvement (%)*** | | **SMD **** |
| --- | --- | --- | --- | --- | --- | --- | --- | --- | --- |
| **Index Drug Arm** | **ATC Level 2 Arm** | **Index Drug Arm** | **ATC Level 2 Arm** | **Index Drug Arm** | **ATC Level 2 Arm** |
| **Positive control (HCQ)** | P01BA02 | 1,907 | 91% | 90% | 48.63 | 48.51 | 3.70 | 3.17 | 0 | 290 |
| **Negative control drugs # (n=52)** | | |  |  |  |  |  |  |  |
| Econazole | D01AC03 | 9,864 | 91% | 92% | 48.95 | 48.95 | 2.91 | 2.63 | 0 | 293 |
| Ketoconazole | D01AC08 | 7,930 | 88% | 88% | 47.19 | 47.31 | 2.58 | 2.55 | 0 | 294 |
| Bifonazole | D01AC10 | 4,791 | 89% | 89% | 51.51 | 51.61 | 2.69 | 2.36 | 0 | 297 |
| Fenticonazole | D01AC12 | 3,535 | 99% | 99% | 43.00 | 43.25 | 1.87 | 1.99 | 0 | 294 |
| Sertaconazole | D01AC14 | 5,818 | 99% | 98% | 43.67 | 43.94 | 2.67 | 2.28 | 0 | 296 |
| Ciclopirox | D01AE14 | 10,727 | 90% | 90% | 49.69 | 49.33 | 2.36 | 2.06 | 0 | 292 |
| Terbinafine | D01AE15 | 2,405 | 89% | 89% | 50.78 | 50.50 | 2.29 | 1.65 | 0 | 297 |
| Amorolfine | D01AE16 | 3,981 | 92% | 91% | 53.34 | 53.27 | 2.05 | 2.36 | 0 | 294 |
| Fusidic acid | D06AX01 | 9,003 | 90% | 90% | 50.20 | 50.03 | 2.20 | 2.04 | 0 | 294 |
| Mupirocin | D06AX09 | 6,151 | 90% | 90% | 50.23 | 49.92 | 2.25 | 2.11 | 0 | 296 |
| Aciclovir | D06BB03 | 5,280 | 93% | 94% | 49.72 | 49.85 | 2.41 | 2.39 | 0 | 293 |
| Metronidazole | D06BX01 | 3,292 | 93% | 93% | 50.84 | 50.70 | 2.12 | 2.24 | 0 | 294 |
| Hydrocortisone butyrate | D07AB02 | 8,850 | 89% | 90% | 50.57 | 50.51 | 2.00 | 1.78 | 0 | 294 |
| Desonide | D07AB08 | 9,588 | 90% | 91% | 49.02 | 49.03 | 2.24 | 2.30 | 0 | 296 |
| Betamethasone | D07AC01 | 12,011 | 89% | 89% | 49.59 | 49.48 | 2.47 | 1.99 | 0 | 293 |
| Diflucortolone | D07AC06 | 6,586 | 88% | 88% | 51.27 | 51.17 | 1.94 | 1.99 | 0 | 293 |
| Fluticasone | D07AC17 | 2,205 | 89% | 88% | 50.37 | 49.87 | 1.75 | 1.72 | 0 | 293 |
| Clobetasol | D07AD01 | 9,836 | 88% | 88% | 50.16 | 49.91 | 2.27 | 2.01 | 0 | 297 |
| Betamethasone | D07XC01 | 2,546 | 89% | 89% | 50.79 | 50.61 | 1.91 | 1.65 | 0 | 297 |
| Chlorhexidine | D08AC02 | 6,820 | 89% | 89% | 50.76 | 50.57 | 2.27 | 1.94 | 0 | 295 |
| Hexamidine | D08AC04 | 5,323 | 90% | 89% | 49.59 | 49.70 | 2.97 | 2.24 | 0 | 295 |
| Chlorhexidine in combination | D08AC52 | 13,602 | 88% | 88% | 50.47 | 50.75 | 2.36 | 2.59 | 0 | 292 |
| Povidone-iodine | D08AG02 | 12,750 | 88% | 89% | 50.23 | 49.88 | 2.53 | 2.30 | 0 | 299 |
| Sodium hypochlorite | D08AX07 | 3,874 | 89% | 89% | 51.24 | 50.89 | 3.11 | 3.12 | 0 | 289 |
| Nystatin in combination | G01AA51 | 5,086 | 100% | 100% | 43.46 | 43.62 | 2.23 | 1.99 | 0 | 295 |
| Econazole | G01AF05 | 5,599 | 100% | 100% | 43.31 | 43.39 | 2.11 | 2.02 | 0 | 297 |
| Fenticonazole | G01AF12 | 4,396 | 100% | 100% | 42.43 | 42.44 | 2.16 | 2.39 | 0 | 294 |
| Diclofenac | M02AA15 | 4,493 | 88% | 88% | 50.52 | 50.39 | 2.55 | 1.77 | 0 | 298 |
| Niflumic acid | M02AA17 | 3,778 | 90% | 90% | 50.83 | 51.03 | 1.69 | 2.16 | 0 | 297 |
| Oxymetazoline | R01AA05 | 4,863 | 90% | 90% | 46.68 | 46.97 | 1.66 | 1.74 | 2 | 294 |
| Tobramycin | S01AA12 | 4,585 | 89% | 89% | 50.94 | 50.67 | 2.25 | 1.72 | 0 | 299 |
| Fusidic acid | S01AA13 | 2,718 | 92% | 92% | 50.82 | 50.53 | 2.44 | 3.18 | 0 | 299 |
| Rifamycin | S01AA16 | 2,366 | 91% | 91% | 49.51 | 49.45 | 2.81 | 2.13 | 0 | 293 |
| Azithromycin | S01AA26 | 4,386 | 89% | 89% | 55.07 | 54.09 | 2.25 | 2.14 | 0 | 299 |
| Sodium borate | S01AX07 | 11,004 | 90% | 90% | 52.85 | 52.50 | 2.30 | 2.04 | 0 | 298 |
| Picloxydine | S01AX16 | 3,259 | 88% | 89% | 54.18 | 53.62 | 2.63 | 3.05 | 0 | 294 |
| Dexamethasone | S01BA01 | 2,706 | 89% | 89% | 59.41 | 58.77 | 2.16 | 2.14 | 0 | 298 |
| Indometacin | S01BC01 | 3,365 | 87% | 87% | 63.57 | 62.92 | 1.81 | 1.94 | 0 | 296 |
| Dexamethasone + anti-infectives | S01CA01 | 11,860 | 89% | 89% | 53.14 | 52.18 | 2.20 | 2.22 | 0 | 292 |
| Tropicamide | S01FA06 | 5,151 | 88% | 88% | 58.44 | 57.44 | 2.04 | 2.09 | 0 | 293 |
| Cromoglicic acid | S01GX01 | 5,960 | 93% | 92% | 50.14 | 49.66 | 1.69 | 1.84 | 0 | 291 |
| Levocabastine | S01GX02 | 2,336 | 93% | 94% | 51.64 | 51.25 | 2.40 | 3.03 | 0 | 296 |
| Spaglumic acid | S01GX03 | 2,763 | 92% | 92% | 52.65 | 52.39 | 1.98 | 1.39 | 0 | 292 |
| Ketotifen | S01GX08 | 2,574 | 93% | 93% | 51.56 | 51.75 | 1.68 | 2.24 | 0 | 295 |
| Hypromellose | S01KA02 | 4,029 | 93% | 93% | 53.31 | 53.19 | 2.76 | 2.16 | 0 | 292 |
| Retinol | S01XA02 | 5,157 | 89% | 89% | 53.65 | 53.29 | 2.60 | 2.62 | 0 | 292 |
| Artificial tears and other preparations | S01XA20 | 12,575 | 91% | 91% | 52.24 | 51.57 | 2.56 | 2.46 | 0 | 293 |
| Ofloxacin | S02AA16 | 3,590 | 90% | 90% | 47.89 | 47.73 | 1.92 | 1.76 | 0 | 298 |
| Fluocinolone and anti-infectives | S02CA05 | 2,667 | 91% | 91% | 50.50 | 50.41 | 1.67 | 1.62 | 0 | 290 |
| Dexamethasone and anti-infectives | S02CA06 | 5,321 | 90% | 91% | 48.79 | 48.50 | 1.67 | 1.41 | 0 | 296 |
| Fludrocortisone and anti-infectives | S02CA07 | 3,342 | 92% | 92% | 48.38 | 48.58 | 1.99 | 1.52 | 0 | 292 |
| Combinations (analg. and anesth.) | S02DA30 | 2,419 | 93% | 93% | 46.00 | 46.13 | 1.88 | 1.58 | 0 | 293 |

** Assessed through hospitalizations in the 360 days prior to index date*

*** N covariates with SMD>10% | N covariates in hdPS*

*# Negative controls drugs= topical or locally active drugs with SMD<1% in both control groups comparisons (vs. Any other drug and vs. Same ATC level 2 drugs)*

**Abbreviations:** ATC, Anatomical Therapeutic Chemical; ETS, Eligible treatment sequence; HCQ, hydroxychloroquine; hdPS, High-dimensional propensity score; SMD, Standardized mean difference

**Supplementary Table 4a. Hazard ratios for lupus exacerbations with organ involvement under an intention-to-treat analysis: index drugs versus any other drug.**

The table reports adjusted hazard ratios (aHRs) and 95% confidence intervals (CIs) for lupus exacerbations with organ involvement comparing index drugs with the “any other drug” comparator under an intention-to-treat framework. Estimates are based on eligible treatment sequences (ETS), with covariate balance achieved using high-dimensional propensity score matching.

|  | | **Follow-up (person-years)** | | **No. events**  **(n)** | | **Event rate /100PYs** | | **aHR [95% CI]** | **p-value** |
| --- | --- | --- | --- | --- | --- | --- | --- | --- | --- |
| **Index Drug Arm** | **Any Drug Arm** | **Index Drug Arm** | **Any Drug Arm** | **Index Drug Arm** | **Any Drug Arm** |
| **Positive control (HCQ)** | P01BA02 | 4318.8 | 4,268.0 | 242 | 384 | 5.60 | 9.00 | 0.61 [0.52 - 0.72] | <0.001 |
| **Negative control drugs #** | | | | | | | | | |
| Econazole | D01AC03 | 4833.78 | 4829.89 | 167 | 181 | 3.45 | 3.75 | 0.92 [0.75 - 1.14] | 0.4559 |
| Ketoconazole | D01AC08 | 3875.62 | 3855.73 | 130 | 167 | 3.35 | 4.33 | 0.78 [0.62 - 0.99] | 0.0385 |
| Bifonazole | D01AC10 | 2316.56 | 2313.75 | 83 | 78 | 3.58 | 3.37 | 1.06 [0.78 - 1.44] | 0.7117 |
| Fenticonazole | D01AC12 | 1721.27 | 1728.20 | 60 | 53 | 3.49 | 3.07 | 1.12 [0.78 - 1.63] | 0.5366 |
| Sertaconazole | D01AC14 | 2884.86 | 2873.46 | 80 | 98 | 2.77 | 3.41 | 0.82 [0.61 - 1.10] | 0.1874 |
| Ciclopirox | D01AE14 | 5311.78 | 5318.85 | 155 | 173 | 2.92 | 3.25 | 0.91 [0.73 - 1.14] | 0.4231 |
| Terbinafine | D01AE15 | 1169.72 | 1166.03 | 35 | 46 | 2.99 | 3.95 | 0.77 [0.49 - 1.18] | 0.2297 |
| Amorolfine | D01AE16 | 1934.64 | 1930.64 | 49 | 57 | 2.53 | 2.95 | 0.87 [0.59 - 1.27] | 0.4589 |
| Fusidic acid | D06AX01 | 6431.35 | 6417.15 | 236 | 237 | 3.67 | 3.69 | 0.99 [0.83 - 1.18] | 0.9099 |
| Mupirocin | D06AX09 | 2993.21 | 2995.99 | 99 | 109 | 3.31 | 3.64 | 0.92 [0.70 - 1.21] | 0.5429 |
| Aciclovir | D06BB03 | 2647.57 | 2636.60 | 82 | 94 | 3.10 | 3.57 | 0.88 [0.65 - 1.18] | 0.3862 |
| Metronidazole | D06BX01 | 1605.80 | 1598.31 | 41 | 44 | 2.55 | 2.75 | 0.96 [0.63 - 1.47] | 0.8521 |
| Hydrocortisone butyrate | D07AB02 | 4317.89 | 4301.66 | 149 | 131 | 3.45 | 3.05 | 1.14 [0.90 - 1.44] | 0.2820 |
| Desonide | D07AB08 | 4671.38 | 4674.52 | 164 | 145 | 3.51 | 3.10 | 1.13 [0.91 - 1.42] | 0.2672 |
| Betamethasone | D07AC01 | 9099.68 | 9074.93 | 323 | 321 | 3.55 | 3.54 | 1.01 [0.86 - 1.18] | 0.9209 |
| Diflucortolone | D07AC06 | 3191.69 | 3202.12 | 112 | 103 | 3.51 | 3.22 | 1.08 [0.82 - 1.41] | 0.5882 |
| Fluticasone | D07AC17 | 1083.56 | 1085.88 | 40 | 35 | 3.69 | 3.22 | 1.15 [0.73 - 1.83] | 0.5475 |
| Clobetasol | D07AD01 | 4750.82 | 4777.01 | 164 | 145 | 3.45 | 3.04 | 1.17 [0.93 - 1.46] | 0.1767 |
| Betamethasone | D07XC01 | 1234.02 | 1239.06 | 47 | 29 | 3.81 | 2.34 | 1.67 [1.04 - 2.66] | 0.0333 |
| Chlorhexidine | D08AC02 | 3284.22 | 3292.98 | 127 | 116 | 3.87 | 3.52 | 1.13 [0.88 - 1.45] | 0.3538 |
| Hexamidine | D08AC04 | 2623.70 | 2615.42 | 84 | 109 | 3.20 | 4.17 | 0.77 [0.58 - 1.02] | 0.0724 |
| Chlorhexidine in combination | D08AC52 | 8833.02 | 8795.19 | 343 | 341 | 3.88 | 3.88 | 1.01 [0.87 - 1.18] | 0.8822 |
| Povidone-iodine | D08AG02 | 7598.50 | 7617.21 | 281 | 278 | 3.70 | 3.65 | 1.02 [0.87 - 1.21] | 0.7718 |
| Sodium hypochlorite | D08AX07 | 1878.91 | 1875.99 | 72 | 73 | 3.83 | 3.89 | 0.96 [0.69 - 1.34] | 0.8289 |
| Nystatin in combination | G01AA51 | 2571.94 | 2565.20 | 79 | 92 | 3.07 | 3.59 | 0.87 [0.65 - 1.18] | 0.3826 |
| Econazole | G01AF05 | 3568.99 | 3564.82 | 120 | 137 | 3.36 | 3.84 | 0.86 [0.67 - 1.10] | 0.2315 |
| Fenticonazole | G01AF12 | 2184.91 | 2185.33 | 65 | 75 | 2.97 | 3.43 | 0.87 [0.63 - 1.22] | 0.4308 |
| Diclofenac | M02AA15 | 9562.58 | 9541.28 | 316 | 333 | 3.30 | 3.49 | 0.98 [0.84 - 1.14] | 0.7677 |
| Niflumic acid | M02AA17 | 1849.74 | 1846.08 | 56 | 69 | 3.03 | 3.74 | 0.83 [0.58 - 1.18] | 0.2958 |
| Oxymetazoline | R01AA05 | 2391.12 | 2391.04 | 51 | 79 | 2.13 | 3.30 | 0.60 [0.42 - 0.86] | 0.0052 |
| Tobramycin | S01AA12 | 2222.86 | 2222.77 | 91 | 90 | 4.09 | 4.05 | 1.00 [0.74 - 1.34] | 0.9975 |
| Fusidic acid | S01AA13 | 1318.00 | 1317.86 | 45 | 45 | 3.41 | 3.41 | 0.99 [0.66 - 1.50] | 0.9799 |
| Rifamycin | S01AA16 | 1142.62 | 1147.45 | 42 | 41 | 3.68 | 3.57 | 1.04 [0.68 - 1.61] | 0.8424 |
| Azithromycin | S01AA26 | 2073.69 | 2084.04 | 81 | 69 | 3.91 | 3.31 | 1.16 [0.84 - 1.61] | 0.3556 |
| Sodium borate | S01AX07 | 5163.94 | 5135.70 | 179 | 201 | 3.47 | 3.91 | 0.88 [0.72 - 1.08] | 0.2088 |
| Picloxydine | S01AX16 | 1589.94 | 1573.31 | 40 | 48 | 2.52 | 3.05 | 0.82 [0.54 - 1.25] | 0.3497 |
| Dexamethasone | S01BA01 | 1283.90 | 1285.03 | 50 | 37 | 3.89 | 2.88 | 1.35 [0.88 - 2.07] | 0.1707 |
| Indometacin | S01BC01 | 1644.20 | 1630.06 | 34 | 66 | 2.07 | 4.05 | 0.51 [0.34 - 0.78] | 0.0016 |
| Dexamethasone + anti-infectives | S01CA01 | 5839.16 | 5829.43 | 191 | 219 | 3.27 | 3.76 | 0.87 [0.71 - 1.05] | 0.1471 |
| Tropicamide | S01FA06 | 2473.31 | 2472.98 | 81 | 70 | 3.27 | 2.83 | 1.16 [0.84 - 1.61] | 0.3656 |
| Cromoglicic acid | S01GX01 | 2928.38 | 2903.33 | 75 | 90 | 2.56 | 3.10 | 0.83 [0.61 - 1.12] | 0.2276 |
| Levocabastine | S01GX02 | 1137.87 | 1123.45 | 30 | 43 | 2.64 | 3.83 | 0.69 [0.43 - 1.09] | 0.1134 |
| Spaglumic acid | S01GX03 | 1344.51 | 1332.09 | 35 | 39 | 2.60 | 2.93 | 0.90 [0.57 - 1.43] | 0.6604 |
| Ketotifen | S01GX08 | 1248.98 | 1245.81 | 39 | 39 | 3.12 | 3.13 | 1.00 [0.64 - 1.56] | 0.9841 |
| Hypromellose | S01KA02 | 1952.59 | 1963.82 | 59 | 57 | 3.02 | 2.90 | 1.05 [0.73 - 1.52] | 0.7837 |
| Retinol | S01XA02 | 2488.28 | 2477.23 | 85 | 110 | 3.42 | 4.44 | 0.76 [0.57 - 1.00] | 0.0521 |
| Artificial tears and other preparations | S01XA20 | 6290.08 | 6287.84 | 224 | 222 | 3.56 | 3.53 | 1.02 [0.84 - 1.22] | 0.8732 |
| Ofloxacin | S02AA16 | 1772.46 | 1769.02 | 65 | 49 | 3.67 | 2.77 | 1.30 [0.90 - 1.89] | 0.1609 |
| Fluocinolone and anti-infectives | S02CA05 | 1303.70 | 1301.64 | 34 | 45 | 2.61 | 3.46 | 0.75 [0.48 - 1.17] | 0.2104 |
| Dexamethasone and anti-infectives | S02CA06 | 2690.74 | 2694.43 | 94 | 93 | 3.49 | 3.45 | 1.00 [0.75 - 1.34] | 0.9761 |
| Fludrocortisone and anti-infectives | S02CA07 | 1656.81 | 1646.88 | 38 | 58 | 2.29 | 3.52 | 0.63 [0.42 - 0.95] | 0.0291 |
| Combinations (analg. and anesth.) | S02DA30 | 1192.18 | 1191.45 | 40 | 45 | 3.36 | 3.78 | 0.89 [0.58 - 1.36] | 0.5809 |

*Negative controls drugs= topical or locally active drugs with SMD<1% in both control groups comparisons (vs. Any other drug and vs. Same ATC level 2 drugs)*

**Abbreviations:** aHR, adjusted hazard ratio; Analg., analgesics; Anesth., anesthetics; ATC, Anatomical Therapeutic Chemical; CI, confidence interval; ETS, eligible treatment sequence; HCQ, hydroxychloroquine; PY, person-year

**Supplementary Table 4b. Hazard ratios for lupus exacerbations with organ involvement under an intention-to-treat analysis: index drugs versus drugs of the same ATC level 2 category.**

The table reports adjusted hazard ratios (aHRs) and 95% confidence intervals (CIs) for lupus exacerbations with organ involvement comparing index drugs with the “same Level 2” comparator under an intention-to-treat framework. Estimates are based on eligible treatment sequences (ETS), with covariate balance achieved using high-dimensional propensity score matching.

|  | | **Follow-up person-years** | | **No. Events**  **(n)** | | **Event rate /100PYs** | | **aHR [IC 95%]** | **p-value** |
| --- | --- | --- | --- | --- | --- | --- | --- | --- | --- |
| **Index Drug Arm** | **ATC Level 2 Arm** | **Index Drug Arm** | **ATC Level 2 Arm** | **Index Drug Arm** | **ATC Level 2 Arm** |
| **Positive Tracker (HCQ)** | P01BA02 | 928.6 | 929.3 | 37 | 45 | 3.98 | 4.84 | 0.80 [0.52 - 1.22] | 0.2983 |
| **Negative Control Drugs / Same ATC level 2** | | | | | | | | | |
| Econazole | D01AC03 | 4748.60 | 4768.67 | 159 | 162 | 3.35 | 3.40 | 0.98 [0.79 - 1.22] | 0.8472 |
| Ketoconazole | D01AC08 | 3843.83 | 3843.96 | 127 | 133 | 3.30 | 3.46 | 0.95 [0.75 - 1.21] | 0.6838 |
| Bifonazole | D01AC10 | 2319.91 | 2326.56 | 84 | 69 | 3.62 | 2.97 | 1.20 [0.88 - 1.65] | 0.2552 |
| Fenticonazole | D01AC12 | 1715.41 | 1729.76 | 61 | 50 | 3.56 | 2.89 | 1.24 [0.85 - 1.81] | 0.2574 |
| Sertaconazole | D01AC14 | 2818.55 | 2820.69 | 76 | 91 | 2.70 | 3.23 | 0.82 [0.60 - 1.11] | 0.1936 |
| Ciclopirox | D01AE14 | 5203.26 | 5220.54 | 152 | 151 | 2.92 | 2.89 | 1.02 [0.81 - 1.28] | 0.8705 |
| Terbinafine | D01AE15 | 1168.86 | 1170.22 | 34 | 26 | 2.91 | 2.22 | 1.31 [0.79 - 2.18] | 0.3021 |
| Amorolfine | D01AE16 | 1936.99 | 1938.46 | 48 | 54 | 2.48 | 2.79 | 0.88 [0.59 - 1.29] | 0.5049 |
| Fusidic acid | D06AX01 | 4379.52 | 4387.01 | 150 | 119 | 3.43 | 2.71 | 1.26 [0.99 - 1.60] | 0.0597 |
| Mupirocin | D06AX09 | 2964.40 | 2976.62 | 91 | 94 | 3.07 | 3.16 | 0.97 [0.73 - 1.30] | 0.8552 |
| Aciclovir | D06BB03 | 2600.65 | 2596.92 | 79 | 90 | 3.04 | 3.47 | 0.87 [0.64 - 1.17] | 0.3530 |
| Metronidazole | D06BX01 | 1601.23 | 1596.15 | 41 | 45 | 2.56 | 2.82 | 0.91 [0.60 - 1.39] | 0.6664 |
| Hydrocortisone butyrate | D07AB02 | 4299.29 | 4307.46 | 148 | 135 | 3.44 | 3.13 | 1.10 [0.87 - 1.38] | 0.4449 |
| Desonide | D07AB08 | 4648.19 | 4662.84 | 161 | 161 | 3.46 | 3.45 | 1.00 [0.80 - 1.24] | 0.9891 |
| Betamethasone | D07AC01 | 5830.65 | 5849.20 | 203 | 209 | 3.48 | 3.57 | 0.96 [0.79 - 1.16] | 0.6672 |
| Diflucortolone | D07AC06 | 3185.80 | 3200.45 | 110 | 95 | 3.45 | 2.97 | 1.16 [0.88 - 1.53] | 0.2863 |
| Fluticasone | D07AC17 | 1077.11 | 1080.59 | 40 | 36 | 3.71 | 3.33 | 1.11 [0.71 - 1.74] | 0.6573 |
| Clobetasol | D07AD01 | 4737.72 | 4769.57 | 158 | 173 | 3.33 | 3.63 | 0.92 [0.74 - 1.15] | 0.4749 |
| Betamethasone | D07XC01 | 1228.06 | 1236.43 | 47 | 41 | 3.83 | 3.32 | 1.17 [0.77 - 1.77] | 0.4686 |
| Chlorhexidine | D08AC02 | 3268.02 | 3273.73 | 124 | 103 | 3.79 | 3.15 | 1.21 [0.93 - 1.57] | 0.1602 |
| Hexamidine | D08AC04 | 2614.39 | 2615.78 | 82 | 86 | 3.14 | 3.29 | 0.95 [0.70 - 1.29] | 0.7589 |
| Chlorhexidine in combination | D08AC52 | 6596.48 | 6590.13 | 260 | 233 | 3.94 | 3.54 | 1.12 [0.93 - 1.33] | 0.2270 |
| Povidone-iodine | D08AG02 | 6158.75 | 6177.51 | 227 | 245 | 3.69 | 3.97 | 0.93 [0.77 - 1.11] | 0.3985 |
| Sodium hypochlorite | D08AX07 | 1855.25 | 1862.31 | 72 | 66 | 3.88 | 3.54 | 1.08 [0.78 - 1.51] | 0.6364 |
| Nystatin in combination | G01AA51 | 2468.73 | 2474.47 | 70 | 68 | 2.84 | 2.75 | 1.05 [0.76 - 1.47] | 0.7540 |
| Econazole | G01AF05 | 2725.38 | 2710.92 | 79 | 81 | 2.90 | 2.99 | 0.94 [0.69 - 1.28] | 0.6848 |
| Fenticonazole | G01AF12 | 2132.47 | 2135.14 | 62 | 71 | 2.91 | 3.33 | 0.87 [0.62 - 1.23] | 0.4401 |
| Diclofenac | M02AA15 | 2184.10 | 2189.61 | 65 | 64 | 2.98 | 2.92 | 1.01 [0.72 - 1.43] | 0.9532 |
| Niflumic acid | M02AA17 | 1838.01 | 1845.72 | 53 | 47 | 2.88 | 2.55 | 1.13 [0.76 - 1.68] | 0.5373 |
| Oxymetazoline | R01AA05 | 2384.52 | 2391.16 | 49 | 61 | 2.05 | 2.55 | 0.79 [0.54 - 1.16] | 0.2301 |
| Tobramycin | S01AA12 | 2212.01 | 2230.85 | 90 | 62 | 4.07 | 2.78 | 1.44 [1.04 - 1.98] | 0.0274 |
| Fusidic acid | S01AA13 | 1315.69 | 1323.69 | 44 | 43 | 3.34 | 3.25 | 1.03 [0.68 - 1.57] | 0.8803 |
| Rifamycin | S01AA16 | 1140.34 | 1149.69 | 42 | 36 | 3.68 | 3.13 | 1.18 [0.76 - 1.84] | 0.4635 |
| Azithromycin | S01AA26 | 2089.47 | 2108.24 | 80 | 81 | 3.83 | 3.84 | 0.98 [0.72 - 1.34] | 0.9198 |
| Sodium borate | S01AX07 | 5315.92 | 5340.70 | 182 | 160 | 3.42 | 3.00 | 1.14 [0.92 - 1.40] | 0.2396 |
| Picloxydine | S01AX16 | 1586.16 | 1586.08 | 38 | 54 | 2.40 | 3.40 | 0.70 [0.46 - 1.06] | 0.0933 |
| Dexamethasone | S01BA01 | 1294.56 | 1303.52 | 49 | 44 | 3.79 | 3.38 | 1.12 [0.75 - 1.68] | 0.5870 |
| Indometacin | S01BC01 | 1619.82 | 1620.12 | 34 | 52 | 2.10 | 3.21 | 0.67 [0.43 - 1.02] | 0.0644 |
| Dexamethasone + anti-infectives | S01CA01 | 5749.71 | 5762.75 | 185 | 195 | 3.22 | 3.38 | 0.95 [0.78 - 1.16] | 0.6087 |
| Tropicamide | S01FA06 | 2478.04 | 2492.55 | 80 | 78 | 3.23 | 3.13 | 1.03 [0.75 - 1.41] | 0.8471 |
| Cromoglicic acid | S01GX01 | 2923.38 | 2912.52 | 75 | 77 | 2.57 | 2.64 | 0.97 [0.70 - 1.33] | 0.8384 |
| Levocabastine | S01GX02 | 1135.68 | 1132.04 | 31 | 46 | 2.73 | 4.06 | 0.67 [0.43 - 1.06] | 0.0886 |
| Spaglumic acid | S01GX03 | 1340.26 | 1339.96 | 35 | 31 | 2.61 | 2.31 | 1.13 [0.70 - 1.84] | 0.6145 |
| Ketotifen | S01GX08 | 1247.54 | 1248.48 | 38 | 38 | 3.05 | 3.04 | 1.00 [0.64 - 1.57] | 0.9975 |
| Hypromellose | S01KA02 | 1948.19 | 1963.98 | 59 | 64 | 3.03 | 3.26 | 0.92 [0.65 - 1.31] | 0.6511 |
| Retinol | S01XA02 | 2471.82 | 2491.60 | 85 | 88 | 3.44 | 3.53 | 0.96 [0.72 - 1.30] | 0.8126 |
| Artificial tears and other preparations | S01XA20 | 6076.05 | 6114.10 | 204 | 179 | 3.36 | 2.93 | 1.15 [0.94 - 1.40] | 0.1858 |
| Ofloxacin | S02AA16 | 1734.18 | 1743.16 | 62 | 51 | 3.58 | 2.93 | 1.21 [0.84 - 1.75] | 0.3118 |
| Fluocinolone and anti-infectives | S02CA05 | 1290.15 | 1297.47 | 31 | 39 | 2.40 | 3.01 | 0.80 [0.50 - 1.27] | 0.3425 |
| Dexamethasone and anti-infectives | S02CA06 | 2579.58 | 2584.62 | 83 | 75 | 3.22 | -2.90 | 1.11 [0.81 - 1.52] | 0.5159 |
| Fludrocortisone and anti-infectives | S02CA07 | 1625.27 | 1631.34 | 36 | 57 | 2.22 | 3.49 | 0.63 [0.42 - 0.96] | 0.0331 |
| Combinations (analg. and anesth.) | S02DA30 | 1173.61 | 1177.40 | 38 | 43 | 3.24 | 3.65 | 0.89 [0.58 - 1.38] | 0.6003 |

*Negative controls drugs= topical or locally active drugs with SMD<1% in both control groups comparisons (vs. Any other drug and vs. Same ATC level 2 drugs)*

**Abbreviations:** aHR, adjusted hazard ratio; Analg., analgesics; Anesth., anesthetics; ATC, Anatomical Therapeutic Chemical; CI, confidence interval; ETS, eligible treatment sequence; HCQ, hydroxychloroquine; PY, person-year

**Supplementary Table 5: Case ascertainment algorithm for systemic lupus erythematosus in the SNDS**

The table describes the criteria used to identify patients with systemic lupus erythematosus (SLE) in the French National Health Data System (SNDS), including diagnostic codes, treatment-based criteria, and long-term chronic condition status (“Affection de Longue Durée”, ALD).

| **SLE Definition** | A]. At least two hospitalizations with a ICD-10 diagnosis code for SLE [M32.1, M32.8 or M32.9]*  OR  B] At least one hospitalization with a principal diagnosis code for SLE* and a M32 code of ‘ALD’ status (code for severe “long-term chronic condition, *Affectation longue durée”* with 100% coverage)  OR  C] At least one hospitalization with a principal diagnosis code for SLE* and at least two dispensings of a specific SLE treatment# within a one-year period  OR  D] a M32 code of ‘ALD’ status and at least two dispensings of a specific SLE treatment# within a one-year period |
| --- | --- |
| **[*] ICD-10 SLE Codes** | [M32.1]: Systemic lupus erythematosus with organ or system involvement [M32.8]: Other forms of systemic lupus erythematosus [M32.9]: Systemic lupus erythematosus, unspecified |
| **[#] SPECIFIC SLE TREATMENTS** | Hydroxychloroquine, chloroquine, methotrexate, belimumab, azathioprine, mycophenolic acid, rituximab, ciclosporin, cyclophosphamide. |

**Abbreviations:** ALD, Affectation longue durée (long-term chronic disease); ICD, International Classification of Diseases; SLE, systemic lupus erythomatosus

**Supplementary Table 6: Criteria for the exclusion of patients with advanced systemic lupus erythematosus**

The table details the clinical, treatment-based, and procedure-related criteria used to identify and exclude patients with advanced systemic lupus erythematosus (SLE) at cohort entry, including renal involvement, dialysis procedures, use of medications indicative of advanced disease, and hospitalization for acute nephritis.

| **1/ CHRONIC RENAL DISEASE** | **ICD-10 CODES** |
| --- | --- |
| Hypertensive heart and chronic kidney disease with (congestive) heart failure | I13.0 |
| Hypertensive heart and chronic kidney disease with both (congestive) heart failure and stage 5 chronic kidney disease, or end stage renal disease | I13.2 |
| Hypertensive heart and chronic kidney disease, unspecified | I13.9 |
| Chronic nephritic syndrome | N03 |
| Hereditary nephropathy, not elsewhere classified | N07 |
| Chronic tubulo-interstitial nephritis | N11 |
| Chronic kidney disease (CKD) | N18 |
| Kidney transplant status | Z94.0 |
| Care involving renal dialysis | Z49.0 |
| Care involving dialysis catheter | Z49.1 |
| Care involving other dialysis | Z49.2 |
| Dependence on renal dialysis | Z99.2 |
| Other renal dialysis (SNDS Specific codes) | [*] |
| **2/ DRUGS USED FOR ADVANCED DISEASE** | **ATC CODE** |
| Azathioprine | L04AX01 |
| Cyclosporin | L04AD01 |
| Cyclophosphamide | L01AA01 |
| Mycophenolic acid | L04AA06 |
| Rituximab | L01XC02 |
| Tacrolimus | L04AD02 |
| **3/ ACUTE NEPHRITIS** | **ICD-10 CODES** |
| Acute nephritic syndrome | N00 |
| Rapidly progressive nephritic syndrome | N01 |
| Nephrotic syndrome | N04 |
| Unspecified nephritic syndrome | N05 |
| Isolated proteinuria with specified morphological lesion | N06 |
| Glomerular disorders in blood diseases and disorders involving the immune mechanism | N082 |
| Glomerular disorders in systemic connective tissue disorders | N085 |
| Acute tubulo-interstitial nephritis | N10 |
| Renal tubulo-interstitial disorders in blood diseases and disorders involving the immune mechanism | N162 |
| Renal tubulo-interstitial disorders in systemic connective tissue disorders | N164 |
| Acute renal failure | N17 |

*[*] Specific SNDS codes for dialysis*

**Supplementary Table 7: Hospitalizations for acute organ involvement used to define the study outcome**

The table lists the diagnostic codes and clinical criteria used to identify hospitalizations for acute organ involvement, which constituted the study outcome for systemic lupus erythematosus exacerbations.

| **Outcome diagnosis** | **ICD-10 Codes** |
| --- | --- |
| **Acute Nephritis** | N00 ; N01 ; N04 ; N05 ; N06 ; N08.5 ; N08.2 ; N10 ; N16.2 ; N16.4 ; N17 |
| **Cardiac inflammatory outcomes:** |  |
| o Myocarditis: | I40.1 ; I40.8 ; I40.9 ; I41.8 |
| o Pericarditis: | I30 ; I31 ; I32 |
| o Endocarditis* | I39.0 ; I39.1 ; I39.2 ; I39.3 ; I39.4 ; I39.8 |
| **Pulmonary SLE-related outcomes** | J84 ; J90 ; J91 ; J99.1 ; J96.0 |
| **Haematologic** | D69.3 ; D69.5 ; D69.6 ; D59.1 |
| **Neurologic** | G40 ; G41 ; G05.8 |

*[*] Considered as exacerbations due to overlaps in code use with other cardiac inflammatory conditions*

**Supplementary Table 8: Dimensions of the covariates included in the high-dimensional propensity score (hdPS)**

The table summarizes the number and types of covariates included in the hdPS, stratified by data dimensions and sources used in the propensity score construction.

| **#** | **Dimension** | **Coding system** |
| --- | --- | --- |
| 1 | Treatment | ATC level 2 |
| 2 | Hospitalization | ICD-10 code (3 digits) |
| 3 | Medical Consultation | Type of consultation (GP, Specialist, Other) |
| 4 | Medical Procedures | Procedure code (CCAM) (4 digits) |
| 5 | Laboratory Tests | NABM code (grouped) |
| 6 | Medical Devices | LPP code (grouped) |
| 7 | Acute organ damage | ICD-10 code |
| 8 | Long-term chronic disease | ALD classification |
| 9 | Comorbidities | Specific comorbidities |
| 10 | Demographic characteristics / Date | Gender – Age – Index Date |

**Abbreviations: ALD,** *Affectation longue durée;* ***CCAM,*** *Classification Commune des Actes Médicaux;* GP, General practitioner;ICD, International Classification of Diseases, tenth revision; *LPP, Liste des Produits et Prestations; NABM, Nomenclature des Actes de Biologie Médicale*
